# Supplementary material for: R- Is Superior to S-Form of α-Lipoic Acid in Anti-Inflammatory and Antioxidant Effects in Laying Hens
Source: MDPI journal article supplement (doi:10.3390/antiox11081530), 2022-08-05
Supplement: s1 [file s1]

**Table S1.** Composition and nutrient levels of the basal diet (air-dry basis).

| Ingredients (%)                    | Composition | Nutrient levels (%)          | Value |
|------------------------------------|-------------|------------------------------|-------|
| Corn                               | 64.60       | Metabolic energy (Kcal/kg)   | 2690  |
| Soybean meal                       | 24.20       | Crude Protein                | 16.04 |
| calcium hydrophosphate             | 1.70        | Calcium                      | 3.60  |
| Limestone                          | 8.20        | Available phosphorus (%)     | 0.39  |
| Sodium chloride                    | 0.30        | Methionine                   | 0.38  |
| DL-methionine (98%)                | 0.12        | Sulfur-containing amino acid | 0.65  |
| Choline chloride (50%)             | 0.10        | Lysine                       | 0.78  |
| Vitamin premix <sup>a</sup>        | 0.04        | Threonine                    | 0.59  |
| Trace elements premix <sup>b</sup> | 0.30        |                              |       |
| Ethoxyquin (60%)                   | 0.02        |                              |       |
| Zeolite powder + Lipoic acid       | 0.42        |                              |       |

<sup>a</sup>premix provided the following per kilogram of the diet: vitamin A, 11 700 IU; vitamin D3, 3600IU; vitamin E, 21 IU; vitamin K3, 4.2 mg; vitamin B1, 3.0 mg; vitamin B2, 10.2 mg; folic acid, 0.9 mg; pantothenic acid calcium, 15.0 mg; niacin, 45.0 mg; vitamin B6, 5.4 mg; vitamin B12, 24 µg; biotin, 0.15 mg.

<sup>b</sup>premix provided the following per kilogram of the diet: Cu (as copper sulfate) 6.00 mg; Fe (as ferrous sulfate) 60.0 mg; Mn (as manganese sulfate) 80.0 mg; Zn (as zinc sulfate) 83.0 mg; Se (as sodium selenite) 0.30 mg; I (as potassium iodide) 1.00 mg.
